# Supplementary material
Source: publisher site journal article supplement (https://static.cambridge.org/content/id/urn:cambridge.org:id:article:S0090599219001302/resource/name/S0090599219001302supp004.docx)
Supplement: Supplementary file 1 [file S0090599219001302supp004.docx]

**Appendix**

**Codebook**

The codebook used for this research consists of two sections and involves two main stages in the analysis. The first section involves the identification of the basic keywords representing references to a nation in the direct speech of presidents during the time period under study. The second section involves the labeling of the content according to the type of issues that a particular news clip (that contains the selected keywords) emphasized.

1. Does the news clip containing the direct speech of a president (the direct speech is previously highlighted throughout the dataset) contain any of the keywords under study?

Keywords: “nation”, “nationality”, “national”, “nationalism”, “people”, “people’s”, “compatriots”, “Motherland”, ”Fatherland”, and “patriot” in Russian (for Russian media) and in both Russian and Ukrainian (for Ukrainian media).

If yes, is this keyword associated with the characteristics of the (Russian/Ukrainian) nation, calls for national unity, national revival, appeals to patriotism, references to national pride, and/or threats to the nation? If yes, code as a reference to a nation.

2. Does this reference to a nation focus on one of the three main groups of issue areas? You can select more than one:[[1]](#footnote-1)

a. Political:

- diplomatic and/or foreign policy activities that impact states politically;

- domestic political issues such as protests, elections;

- issues related to security, peace and political stability in a country;

- issues related to human rights, public health, interethnic tensions, environmental situation.

Different types of issues may be included in this category if a leader emphasizes the resolution of these issues as the key political priority/policy goal in a country.

b. Economic:

- events or issues related to domestic economy or economic ties with other countries;

- economic effects of events on individuals, groups, institutions, regions, or a country;

- discussion of potential economic consequences of adopting/not adopting a policy or a law in the future.

Different types of issues may be included in this category if a leader emphasizes the resolution of these issues as having economic importance for a country.

c. Cultural/social:

- history;

- language;

- religion;

- arts/entertainment;

- society, culture and interethnic relations;

- education/science/technology;

- holidays;

- sports.

1. Nodes were originally obtained from Galtung and Ruge’s (1965) study of news values. [↑](#footnote-ref-1)
